# Supplementary material for: Dual-engineered extracellular vesicles enabling endothelial targeting and EphrinB2 delivery for pulp revascularization
Source: Research Square preprint supplement (doi:10.21203/rs.3.rs-7342473/v1), 2025-10-15
Supplement: Supplementary file 1 [file 6e738ff56b9fe5f1bf1fe1ae.docx]

**Supplementary Information**


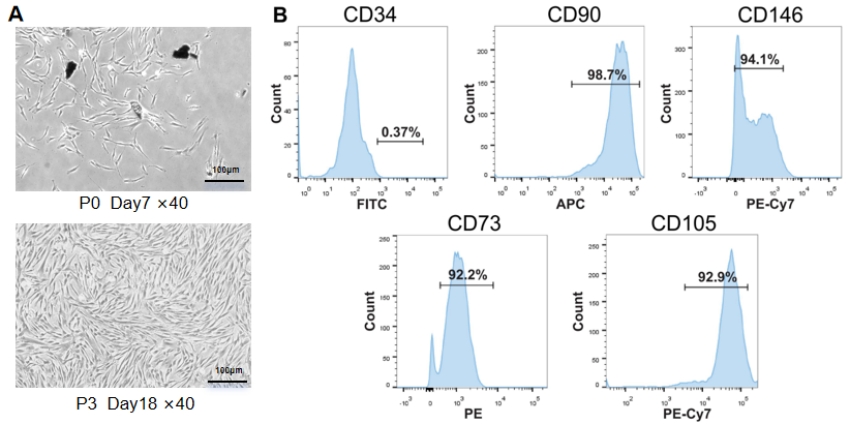
**Figure S1. Characterization of DPSCs.**

1. DPSCs cultured in vitro display a spindle-shaped morphology after 7 and 18 days, Scale bar: 100 μm. (B) Flow cytometric analysis reveals positive expression of CD73, CD90, CD105, and CD146, and negative expression of CD34.

**
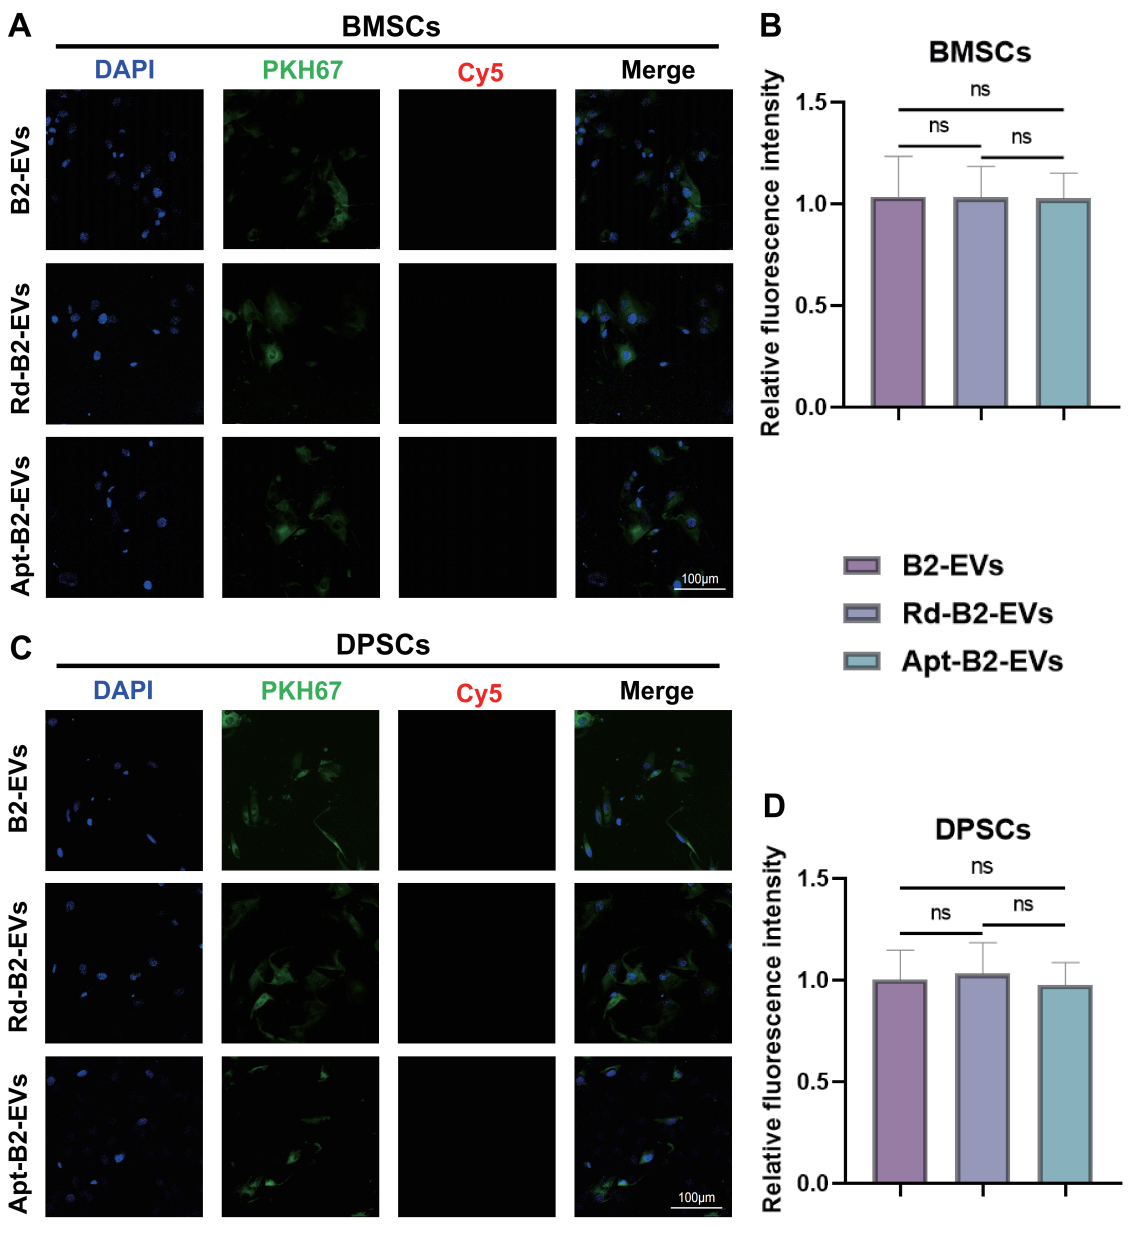
Figure S2. Cellular internalization analysis of engineered EVs in BMSCs and DPSCs.**

(A, C) Representative fluorescence microscopy images showing uptake of PKH67-labeled EVs (green), Rd-B2-EVs, and Apt-B2-EVs, with Cy5-labeled Apt02 (red) in BMSCs (A) and DPSCs (C). (B, D) Quantitative analysis of internalized fluorescence intensity for corresponding groups in BMSCs (B) and DPSCs (D). Data presented as mean±SD (n=3; one-way ANOVA, ns, not significant). Scale bars: 100 µm.

**Table S1. Aptamer sequences and design parameters**

| Aptamer Name | Base Sequence (5′-3′) |
| --- | --- |
| Apt02 | GCTGATAGGATGGGTTGTAGGTCTAGGGGGGGGCC |
| Apt-Rd | GGTTAGGCGTGGGGGGCTGAGGGTGTGAGTACGAT |

**Table S2. Primer sequences and parameters for target gene amplification**

| Primer Name | **Sequence (5’-3’)** | **Target Gene** | **Length (nt)** | **GC Content (%)** |
| --- | --- | --- | --- | --- |
| VEGF-F | TGTGAATGCAGACCAAAGAAAGA | VEGF | 23 | 56.5 |
| VEGF-R | TTCGTTTAACTCAAGCTGCCTCG | VEGF | 23 | 56.5 |
| FGF2-F | GCTGTACTGCAAAAACGGGG | FGF2 | 20 | 60.0 |
| FGF2-R | TCCGTGACCGGTAAGTATTG | FGF2 | 20 | 45.0 |
| ANG1-F | CAGTGCCACAGAGTGGAAGA | ANG1 | 20 | 55.0 |
| ANG1-R | GCTGGTAGGTGTTGCTGATG | ANG1 | 20 | 50.0 |
| EphrinB2-F | GCTGGAGAAAGTGCTGGAAG | EphrinB2 | 20 | 55.0 |
| EphrinB2-R | CAGGTAGGTGTTGCTGATGG | EphrinB2 | 21 | 52.4 |
| GAPDH-F | GGAGCGAGATCCCTCCAAAAT | GAPDH | 21 | 61.9 |
| GAPDH-R | GGCTGTTGTCATACTTCTCATGG | GAPDH | 24 | 58.3 |

**Table S3. Antibodies used for Western Blot analysis**

| Target Protein | Antibody (Host) | Supplier | Catalog # | Dilution |
| --- | --- | --- | --- | --- |
| ERK1/2 | Rabbit Polyclonal | Proteintech | 11257-1-AP | 1:5000 |
| AKT | Rabbit Polyclonal | Proteintech | 10176-2-AP | 1:1000 |
| EphB4 | Rabbit Polyclonal | Proteintech | 20883-1-AP | 1:3000 |
| EphrinB2 | Rabbit Polyclonal | Proteintech | 26533-1-AP | 1:2000 |
| GAPDH | Mouse Monoclonal | Proteintech | 60004-1-Ig | 1:100000 |
| β-actin | Mouse Monoclonal | Proteintech | 66009-1-Ig | 1:10000 |
| CD63 | Mouse Monoclonal | Proteintech | 67605-1-Ig | 1:10000 |
| CD81 | Rabbit Polyclonal | Proteintech | 27855-1-AP | 1:2000 |
| CD9 | Rabbit Polyclonal | Proteintech | 20597-1-AP | 1:5000 |
| P-ERK1/2 | Rabbit Monoclonal | Proteintech | 80031-1-RR | 1:5000 |
| P-AKT | Mouse Monoclonal | Proteintech | 66444-1-Ig | 1:5000 |
| P-EphB4 | Rabbit Polyclonal | Thermofisher | PA5-64792 | 1:1000 |
| P-EphrinB2 | Rabbit Polyclonal | HZbscience | HZ-13085R | 1:500 |
| FGF2 | Rabbit Monoclonal | Abcam | ab208687 | 1:2000 |
| ANG1 | Rabbit Monoclonal | Abcam | ab183702 | 1:2000 |
| VEGF | Rabbit Monoclonal | Abcam | ab32152 | 1:1000 |
